# Supplementary material for: Cell types and neuronal circuitry underlying female aggression in Drosophila
Source: eLife. 2020 Nov 3;9:e58942. doi: 10.7554/eLife.58942 (PMC7787668; doi:10.7554/eLife.58942)
Supplement: Figure 1—source data 1. [file elife-58942-fig1-data1.xlsx]

## Sheet: Figure_1G
	UAS-20xChrimson
Before Stimulus	0.24	0	0	0.12	0	0	0	0	0	0	0	0.76	0	0	0	0	0	0.28	0	0	0	0	0	0.32	0	0	0	0.2	0	0.36	0	0	0.12	0	0	0	0	0.16	0	0	0.12	0.4	0.32	0.28	0.16	0	0.36	0.24	0.2
During Stimulus	0.499445	0	1.19867	0.36626	0	0	0	0.266371	0.36626	0	0	0	0	0	0	0.532741	0	0.133185	0	0	0.099889	0	0.466149	0.133185	0	0.432852	1.03219	0	0.233074	0.36626	0	0.99889	0.266371	0.099889	0	0.665927	0.099889	0	0	0.133185	0	0	0	0.199778	0	0.266371	0	0.332963	0
0 - 30s	0	0	0	0.340909	0.136364	0	0.784091	0.681818	0	0	0	0.477273	0	0	0	0	0	0	0	0.102273	0	0	0	0.477273	0	0	0	0	0	0	0.204545	0.477273	0.511364	0	0	0.136364	0.204545	0	0	0.477273	0.340909	0	0.681818	0.477273	0	0.579545	0	0.0340909	0
30 - 60s	0	0	0	0	0	0	0	0	0.11658	0	0	0.310881	0.194301	0.233161	0	0.310881	0	0	0	0	0	0	0	0	0	0	0.15544	0.388601	0	0.233161	0	0	0	0.272021	0	0	0.466321	0	0.738342	0	0	0.15544	0	0	0	0.582902	0	0.310881	0
[truncated: 265 more columns]

## Sheet: Figure_1H
aIPgSS1 > GFP	EmptySS > TNTe	aIPgSS1 > TNTe
0.220555	1.09278	0.0244444
0.468333	0.577779	0.0805557
0.522222	1.01167	0.0216667
0.879999	0.818334	0.0216667
0.877779	0.645555	0.461112
1.47278	1.48389	0.320556
0.559443	0.172222	0.246111
0.324999	0.108889	0.127222
0.934443	0.100556	0.982779
1.72222	0.227222	0.333888
0.747777	0.528888	0.645
0.326112	0.244445	0.144444
1.16556	1.16167	0.849999
1.00389	1.27445	0.586668
0.33	1.00111	0.107222
0.504999	1.11444	0.121667
0.87111	0.267778	0.197222
1.075	0.474999	0.111111
1.09611	0.278889	0.155556
1.37667	0.318333	0.212222
3.65889	0.638334	0.126111
2.56167	0.726666	0.213333
0.378888	0.923334	0.572778
0.343332	0.241667	0.0733332
0.362778	0.100556	0.00444444
0.278333	0.208889	0.0127778
1.49611	0.117222	0
0.410001	0.081111	0.0105556
0.291667		0.607779
0.131111		0.144444
0.712779
0.534444
0.506667
0.51111
0.509445
0.968889
0.907779
0.87
0.529443
1.33944
0.822222
0.644445
0.678888
0.445557
0.582222
0.579444
0.80889
0.697779
0.393888
0.470556
0.740556
1.21111
0.460557
1.03611
