# Supplementary material for: Cell types and neuronal circuitry underlying female aggression in Drosophila
Source: eLife. 2020 Nov 3;9:e58942. doi: 10.7554/eLife.58942 (PMC7787668; doi:10.7554/eLife.58942)
Supplement: Figure 2—source data 1. [file elife-58942-fig2-data1.xlsx]

## Sheet: Figure2A_panel1
	EmptySS > Chrimson																						aIP-gSS > Chrimson
Before	0	0	0	0	0	0	0.28	0.12	0	0	0	0	0	0	0	0	0	0	0.28	0.4	0	0	0	0.04	0	0	0	0	0	0	0	0	0	0	0	0
During	0.099889	0	0	0	0	0	0	0	0	0	0.0332963	0	0	0	0	0	0	0	0	0	0	0	2.06437	0.566038	2.19756	16.7148	3.76249	9.42286	0.466149	6.3263	3.02997	1.46504	14.6504	2.06437	5.76027	3.32963

## Sheet: Figure2A_panel2
EmptySS > Chrimson	aIPgSS1 > Chrimson
12.3	13.1
30	13.1333
30	5.4
30	4.76664
30	4.36668
30	2.83332
30	2.26668
30	4.13334
30	1.36668
30	28.3667
30	12.3334
30	13
30	6.43332
30	6.86664
30
30
30
30
30
30
30
30

## Sheet: Figure2B_panel1
	EmptySS > 20xUAS-CsChrimson																						aIPgSS1 > Chrimson
Before	0	0	0	0	1.36	0	0	0															0	0	0	0	0	0	0
During	0	0	0	0	0	0	0	0															3.29634	0	4.26193	4.72808	15.1498	2.83019	0.965594

## Sheet: Figure2B_panel2
EmptySS > Chrimson	aIPgSS1 > Chrimson
30	23.1
30	30
30	25.4
30	1.16664
30	1.06668
30	8.43336
30	9.49998
30

## Sheet: Figure2C_panel1
	EmptySS > Chrimson																						aIP-gSS > Chrimson
Before	0.6	0.44	0	0	0	0	0																0	0	0	0	0	0	0
During	1.19867	2.29745	0	0	0	0	0																4.5616	0	1.8313	2.26415	2.89678	5.09434	1.73141

## Sheet: Figure2C_panel2
EmptySS > Chrimson	aIPgSS1 > Chrimson
24.1667	20.5667
30	16.4
1.06668	30
30	7.56666
30	12.8666
30	1.90002
30	23.7
