# Supplementary material for: Cell types and neuronal circuitry underlying female aggression in Drosophila
Source: eLife. 2020 Nov 3;9:e58942. doi: 10.7554/eLife.58942 (PMC7787668; doi:10.7554/eLife.58942)
Supplement: Figure 4—source data 1. [file elife-58942-fig4-data1.xlsx]

## Sheet: Figure_4C
	UAS-20xChrimson
Before Stimulus	0.24	0	0	0.12	0	0	0	0	0	0	0	0.76	0	0	0	0	0	0.28	0	0	0	0	0	0.32	0	0	0	0.2	0		0.56	0	0	0.2	0.12	0	0.48	0.24	0	0.36	0.28	1.24	0	1.84	0.44	0	0	0.12	0.36
During Stimulus	0.499445	0	1.19867	0.36626	0	0	0	0.266371	0.36626	0	0	0	0	0	0	0.532741	0	0.133185	0	0	0.099889	0	0.466149	0.133185	0	0.432852	1.03219	0	0.233074		0.499445	0	0	0	0.532741	0	0.566038	0.899001	0	0.233074	0	0.36626	0.699223	0.166482	0.965594	0.665927	0	0.466149	0.699223
0 - 30s	0	0	0	0.340909	0.136364	0	0.784091	0.681818	0	0	0	0.477273	0	0	0	0	0	0	0	0.102273	0	0	0	0.477273	0	0	0	0	0		0.204545	0.170455	0	0.272727	0	0.647727	0.579545	0	0.886364	1.29545	0	0	0.102273	0.170455	0	0	0	0.238636	0
30 - 60s	0	0	0	0	0	0	0	0	0.11658	0	0	0.310881	0.194301	0.233161	0	0.310881	0	0	0	0	0	0	0	0	0	0	0.15544	0.388601	0		0	0	0	0	0	0	0	0.194301	0	0.194301	0	0.11658	0.272021	0.388601	0	0	0	0	0
[truncated: 147 more columns]
