# Supplementary material for: Cell types and neuronal circuitry underlying female aggression in Drosophila
Source: eLife. 2020 Nov 3;9:e58942. doi: 10.7554/eLife.58942 (PMC7787668; doi:10.7554/eLife.58942)
Supplement: Figure 9—source data 1. [file elife-58942-fig9-data1.xlsx]

## Sheet: Figure_9B
aIPgSS1 > Chrimson Light	aIPgSS1 > Chrimson Dark
0.229974	0.167466
0.23693	0.0521527
0.262257	0.0841879
0.138522	0.0428941
0.177815	0.109239
0.199059	0.166805
0.162074	0.0595634
0.191504	0.0333981

## Sheet: Figure_9E
aIPgSS1 > Chrimson Light	aIPgSS1 > Chrimson Dark
1.48216	1.03641
1.80256	0.830524
2.22001	0.782113
1.15424	0.897799
1.35777	0.932846
1.08892	1.90012
1.14672	0.738714
1.24568	0.386065
