# Supplementary material for: Cell types and neuronal circuitry underlying female aggression in Drosophila
Source: eLife. 2020 Nov 3;9:e58942. doi: 10.7554/eLife.58942 (PMC7787668; doi:10.7554/eLife.58942)
Supplement: Supplementary file 1. [file elife-58942-supp1.xlsx]

## Sheet: Sheet1
	Framewise Performance
Classifier	True Positive	True Negative	False Positive	False Negative	Total Frames Labelled	Videos Used
Female Aggression - 127mm arena	90.9% (4506)	96.1% (11021)	9.1% (452)	3.9% (447)	16426	30
Female Aggression - Inactivation	87.0% (3067)	90.8% (40181)	13.0% (460)	9.2% (4057)	47765	11
Female Aggression - 16mm arena	90.1% (2123)	95.3% (4966)	9.9% (234)	4.7% (246)	7569	5
