# Supplementary material for: Cell types and neuronal circuitry underlying female aggression in Drosophila
Source: eLife. 2020 Nov 3;9:e58942. doi: 10.7554/eLife.58942 (PMC7787668; doi:10.7554/eLife.58942)
Supplement: Supplementary file 2. [file elife-58942-supp2.xlsx]

## Sheet: Fig5.1
Body ID	Instance	Type
5813087620	SMP575_R	SMP575
2147677469	SMP575_R	SMP575
5813057481	SMP574_R	SMP574
614413183	SMP574_R	SMP574
739917109	SMP558_R	SMP558
887588829	SMP558_R	SMP558
796755936	SMP557_R	SMP557
707854620	SMP557_R	SMP557
579536041	SMP556_R	SMP556
798939240	SMP556_R	SMP556
613394707	SMP555_R	SMP555
1013636956	AVLP496_R	AVLP496
1073314797	AVLP496_R	AVLP496
5812982994	AVLP496_R	AVLP496
5813058350	AVLP496_R	AVLP496
5813097634	AVLP496_R	AVLP496
916456567	AVLP495_R	AVLP495
1010235132	AVLP495_R	AVLP495
1204063702	AVLP495_R	AVLP495
1653139353	AVLP494_R	AVLP494
948851462	AVLP494_R	AVLP494
5813053805	AVLP494_R	AVLP494
888146447	AVLP493_R	AVLP493
612336669	AVLP493_R	AVLP493
5813068484	aIPg4_R	aIPg4
861251038	aIPg4_R	aIPg4
768590452	aIPg3_R	aIPg3
5813098975	aIPg3_R	aIPg3
645456880	aIPg2_R	aIPg2
5813035694	aIPg2_R	aIPg2
1882009576	aIPg2_R	aIPg2
676479156	aIPg2_R	aIPg2
5813022814	aIPg2_R	aIPg2
707858790	aIPg1_R	aIPg1
707863263	aIPg1_R	aIPg1
1138212774	aIPg1_R	aIPg1
707854989	aIPg1_R	aIPg1

## Sheet: Fig 6A
Color of Synapses onto pC1d	Input Name	Input type	Input bodyId	Number of Synapses onto pC1d as a Group	Total Synapses onto Neurons as a Group	% of Total Output as a Group	Number of Synapses onto pC1d as an Individual	Total Synapses onto Neurons as an individual	% of Total Output as an Individual
	aIPg1_R	aIPg1	707863263	134	5655	2.36958	57	1620	3.51852
	aIPg1_R	aIPg1	707858790	134	5655	2.36958	27	1213	2.22589
	aIPg1_R	aIPg1	707854989	134	5655	2.36958	26	1643	1.58247
	aIPg1_R	aIPg1	1138212774	134	5655	2.36958	24	1179	2.03562
	SMP093(ADM04)_L	SMP093	581409749	112	2494	4.49078	33	604	5.46358
	SMP093_R	SMP093	488231939	112	2494	4.49078	33	647	5.10046
	SMP093_R	SMP093	550326974	112	2494	4.49078	28	778	3.59897
	SMP093(ADM04)_L	SMP093	580732377	112	2494	4.49078	18	465	3.87097
	AVLP297_R	AVLP297	735733975	108	4248	2.54237	50	1087	4.59982
	AVLP297_R	AVLP297	1354368623	108	4248	2.54237	31	1116	2.77778
	AVLP297_R	AVLP297	1138518446	108	4248	2.54237	17	1172	1.45051
	AVLP297_R	AVLP297	1479156699	108	4248	2.54237	10	873	1.14548
	pC1a_R	pC1a	5813046951	90	3243	2.77521	51	1768	2.88462
	pC1a(PDM09)_L	pC1a	359744514	90	3243	2.77521	39	1475	2.64407
	1041666949			89	11155	0.797848	89	11155	0.797848
	AOTU064(SCB012)_R	AOTU064	1038070642	67	3544	1.89052	67	3544	1.89052
	oviIN_L	oviIN	485934965	59	53229	0.110842	32	24473	0.130756
	oviIN_R	oviIN	423101189	59	53229	0.110842	27	28756	0.0938934
	vpoDN_R	vpoDN	5813057864	55	231	23.8095	55	231	23.8095
	pC1c_R	pC1c	267551639	43	2601	1.65321	43	2601	1.65321

## Sheet: Fig 6B
Color of Synapses from pC1d	Output name	Output type	Output bodyId	Number of Synapses from pC1d as a Group	Total Input from Neurons as a Group	% of Total Input as a Group	Number of Synapses from pC1d as an Individual	Total Input from Neurons as an Individual	% of Total Input as an Individual
	SMP556_R	SMP555/556	579536041	521	2960	17.6014	186	1077	17.2702
	SMP556_R	SMP555/556	798939240	521	2960	17.6014	152	869	17.4914
	SMP555_R	SMP555/556	613394707	521	2960	17.6014	183	1014	18.0473
	aIPg2_R	aIPg2	1882009576	289	3403	8.49251	102	661	15.4312
	aIPg2_R	aIPg2	645456880	289	3403	8.49251	95	711	13.3615
	aIPg2_R	aIPg2	676479156	289	3403	8.49251	58	763	7.60157
	aIPg2_R	aIPg2	5813035694	289	3403	8.49251	18	640	2.8125
	aIPg2_R	aIPg2	5813022814	289	3403	8.49251	16	628	2.54777
	SMP089_R	SMP089	454477603	157	5376	2.92039	62	1993	3.11089
	SMP089_R	SMP089	610351307	157	5376	2.92039	57	1798	3.17019
	SMP089(ADM04)_L	SMP089	484911954	157	5376	2.92039	38	1585	2.39748
	aIPg1_R	aIPg1	707863263	151	2464	6.12825	61	641	9.51638
	aIPg1_R	aIPg1	707854989	151	2464	6.12825	59	484	12.1901
	aIPg1_R	aIPg1	707858790	151	2464	6.12825	16	663	2.41327
	aIPg1_R	aIPg1	1138212774	151	2464	6.12825	15	676	2.21893
	oviIN_R	oviIN	423101189	136	34989	0.388694	105	20082	0.522856
	oviIN_L	oviIN	485934965	136	34989	0.388694	31	14907	0.207956
	SIP024_R	SIP024	708187441	135	2113	6.38902	59	823	7.16889
	SIP024_R	SIP024	893338771	135	2113	6.38902	45	644	6.98758
	SIP024_R	SIP024	5813058272	135	2113	6.38902	31	646	4.79876
	aIPg3_R	aIPg3	768590452	95	1488	6.38441	53	792	6.69192
	aIPg3_R	aIPg3	5813098975	95	1488	6.38441	42	696	6.03448
	SMP054_R	SMP054	706520453	54	5431	0.994292	49	4303	1.13874
	SMP054(ADM01)_L	SMP054	763885580	54	5431	0.994292	5	1128	0.443262

## Sheet: Fig 7 with IDs
Input Name	Input type	Input bodyId	Number of Synapses	Output name	Output type	Output bodyId
pC1d_R	pC1d	5813063587	19	pC1c_R	pC1c	267551639
pC1d_R	pC1d	5813063587	16	aIPg1_R	aIPg1	707858790
pC1d_R	pC1d	5813063587	21	pC1e_R	pC1e	514850616
pC1d_R	pC1d	5813063587	95	aIPg2_R	aIPg2	645456880
pC1d_R	pC1d	5813063587	61	aIPg1_R	aIPg1	707863263
pC1d_R	pC1d	5813063587	183	SMP555_R	SMP555	613394707
pC1d_R	pC1d	5813063587	186	SMP556_R	SMP556	579536041
pC1d_R	pC1d	5813063587	18	aIPg2_R	aIPg2	5813035694
pC1d_R	pC1d	5813063587	152	SMP556_R	SMP556	798939240
pC1d_R	pC1d	5813063587	11	pC1b_R	pC1b	267214250
pC1d_R	pC1d	5813063587	102	aIPg2_R	aIPg2	1882009576
pC1d_R	pC1d	5813063587	15	aIPg1_R	aIPg1	1138212774
pC1d_R	pC1d	5813063587	59	aIPg1_R	aIPg1	707854989
pC1d_R	pC1d	5813063587	53	aIPg3_R	aIPg3	768590452
pC1d_R	pC1d	5813063587	58	aIPg2_R	aIPg2	676479156
pC1d_R	pC1d	5813063587	42	aIPg3_R	aIPg3	5813098975
pC1d_R	pC1d	5813063587	16	aIPg2_R	aIPg2	5813022814
pC1c_R	pC1c	267551639	43	pC1d_R	pC1d	5813063587
pC1c_R	pC1c	267551639	19	pC1e_R	pC1e	514850616
pC1c_R	pC1c	267551639	27	SMP555_R	SMP555	613394707
pC1c_R	pC1c	267551639	25	SMP556_R	SMP556	579536041
pC1c_R	pC1c	267551639	14	SMP556_R	SMP556	798939240
pC1c_R	pC1c	267551639	17	pC1b_R	pC1b	267214250
aIPg1_R	aIPg1	707858790	27	pC1d_R	pC1d	5813063587
aIPg1_R	aIPg1	707858790	9	pC1e_R	pC1e	514850616
aIPg1_R	aIPg1	707858790	7	aIPg1_R	aIPg1	707863263
aIPg1_R	aIPg1	707858790	4	aIPg2_R	aIPg2	1882009576
aIPg1_R	aIPg1	707858790	6	aIPg1_R	aIPg1	1138212774
aIPg1_R	aIPg1	707858790	4	aIPg1_R	aIPg1	707854989
aIPg1_R	aIPg1	707858790	6	aIPg3_R	aIPg3	768590452
aIPg1_R	aIPg1	707858790	3	aIPg2_R	aIPg2	676479156
aIPg1_R	aIPg1	707858790	9	aIPg3_R	aIPg3	5813098975
pC1e_R	pC1e	514850616	11	pC1c_R	pC1c	267551639
pC1e_R	pC1e	514850616	17	aIPg1_R	aIPg1	707858790
pC1e_R	pC1e	514850616	9	aIPg2_R	aIPg2	645456880
pC1e_R	pC1e	514850616	17	aIPg1_R	aIPg1	707863263
pC1e_R	pC1e	514850616	39	SMP555_R	SMP555	613394707
pC1e_R	pC1e	514850616	32	SMP556_R	SMP556	579536041
pC1e_R	pC1e	514850616	6	aIPg2_R	aIPg2	5813035694
pC1e_R	pC1e	514850616	16	SMP556_R	SMP556	798939240
pC1e_R	pC1e	514850616	18	aIPg2_R	aIPg2	1882009576
pC1e_R	pC1e	514850616	12	aIPg1_R	aIPg1	1138212774
pC1e_R	pC1e	514850616	12	aIPg1_R	aIPg1	707854989
pC1e_R	pC1e	514850616	17	aIPg3_R	aIPg3	768590452
pC1e_R	pC1e	514850616	10	aIPg2_R	aIPg2	676479156
pC1e_R	pC1e	514850616	22	aIPg3_R	aIPg3	5813098975
pC1e_R	pC1e	514850616	13	aIPg2_R	aIPg2	5813022814
aIPg2_R	aIPg2	645456880	3	aIPg1_R	aIPg1	707863263
aIPg2_R	aIPg2	645456880	4	aIPg2_R	aIPg2	5813035694
aIPg2_R	aIPg2	645456880	5	aIPg2_R	aIPg2	1882009576
aIPg2_R	aIPg2	645456880	5	aIPg1_R	aIPg1	707854989
aIPg2_R	aIPg2	645456880	6	aIPg2_R	aIPg2	676479156
aIPg1_R	aIPg1	707863263	57	pC1d_R	pC1d	5813063587
aIPg1_R	aIPg1	707863263	8	aIPg1_R	aIPg1	707858790
aIPg1_R	aIPg1	707863263	17	pC1e_R	pC1e	514850616
aIPg1_R	aIPg1	707863263	3	aIPg2_R	aIPg2	645456880
aIPg1_R	aIPg1	707863263	4	aIPg2_R	aIPg2	5813035694
aIPg1_R	aIPg1	707863263	3	aIPg2_R	aIPg2	1882009576
aIPg1_R	aIPg1	707863263	5	aIPg1_R	aIPg1	1138212774
aIPg1_R	aIPg1	707863263	5	aIPg1_R	aIPg1	707854989
aIPg1_R	aIPg1	707863263	5	aIPg2_R	aIPg2	676479156
aIPg1_R	aIPg1	707863263	11	aIPg3_R	aIPg3	5813098975
SMP556_R	SMP556	579536041	5	SMP555_R	SMP555	613394707
SMP556_R	SMP556	579536041	3	SMP556_R	SMP556	798939240
aIPg2_R	aIPg2	5813035694	7	aIPg2_R	aIPg2	645456880
aIPg2_R	aIPg2	5813035694	3	aIPg2_R	aIPg2	676479156
aIPg2_R	aIPg2	5813035694	3	aIPg2_R	aIPg2	5813022814
SMP556_R	SMP556	798939240	5	SMP555_R	SMP555	613394707
pC1b_R	pC1b	267214250	7	SMP555_R	SMP555	613394707
pC1b_R	pC1b	267214250	15	SMP556_R	SMP556	579536041
pC1b_R	pC1b	267214250	11	SMP556_R	SMP556	798939240
aIPg2_R	aIPg2	1882009576	5	aIPg1_R	aIPg1	707858790
aIPg2_R	aIPg2	1882009576	11	aIPg2_R	aIPg2	645456880
aIPg2_R	aIPg2	1882009576	7	aIPg1_R	aIPg1	707863263
aIPg2_R	aIPg2	1882009576	5	aIPg1_R	aIPg1	1138212774
aIPg2_R	aIPg2	1882009576	7	aIPg1_R	aIPg1	707854989
aIPg2_R	aIPg2	1882009576	4	aIPg2_R	aIPg2	676479156
aIPg2_R	aIPg2	1882009576	3	aIPg2_R	aIPg2	5813022814
aIPg1_R	aIPg1	1138212774	24	pC1d_R	pC1d	5813063587
aIPg1_R	aIPg1	1138212774	5	aIPg1_R	aIPg1	707858790
aIPg1_R	aIPg1	1138212774	5	pC1e_R	pC1e	514850616
aIPg1_R	aIPg1	1138212774	5	aIPg1_R	aIPg1	707863263
aIPg1_R	aIPg1	1138212774	8	aIPg2_R	aIPg2	1882009576
aIPg1_R	aIPg1	1138212774	5	aIPg1_R	aIPg1	707854989
aIPg1_R	aIPg1	1138212774	6	aIPg3_R	aIPg3	768590452
aIPg1_R	aIPg1	1138212774	8	aIPg3_R	aIPg3	5813098975
aIPg1_R	aIPg1	707854989	26	pC1d_R	pC1d	5813063587
aIPg1_R	aIPg1	707854989	12	aIPg1_R	aIPg1	707858790
aIPg1_R	aIPg1	707854989	9	pC1e_R	pC1e	514850616
aIPg1_R	aIPg1	707854989	9	aIPg2_R	aIPg2	645456880
aIPg1_R	aIPg1	707854989	17	aIPg1_R	aIPg1	707863263
aIPg1_R	aIPg1	707854989	9	aIPg2_R	aIPg2	1882009576
aIPg1_R	aIPg1	707854989	9	aIPg1_R	aIPg1	1138212774
aIPg1_R	aIPg1	707854989	5	aIPg3_R	aIPg3	5813098975
aIPg3_R	aIPg3	768590452	6	pC1c_R	pC1c	267551639
aIPg3_R	aIPg3	768590452	8	aIPg1_R	aIPg1	707858790
aIPg3_R	aIPg3	768590452	3	aIPg1_R	aIPg1	707863263
aIPg3_R	aIPg3	768590452	6	aIPg1_R	aIPg1	1138212774
aIPg2_R	aIPg2	676479156	3	aIPg1_R	aIPg1	707858790
aIPg2_R	aIPg2	676479156	4	aIPg2_R	aIPg2	645456880
aIPg2_R	aIPg2	676479156	3	aIPg2_R	aIPg2	5813035694
aIPg2_R	aIPg2	676479156	4	aIPg2_R	aIPg2	1882009576
aIPg2_R	aIPg2	676479156	4	aIPg2_R	aIPg2	5813022814
pC1a_R	pC1a	5813046951	51	pC1d_R	pC1d	5813063587
pC1a_R	pC1a	5813046951	60	pC1c_R	pC1c	267551639
pC1a_R	pC1a	5813046951	11	pC1e_R	pC1e	514850616
pC1a_R	pC1a	5813046951	27	SMP556_R	SMP556	579536041
pC1a_R	pC1a	5813046951	45	SMP556_R	SMP556	798939240
pC1a_R	pC1a	5813046951	56	pC1b_R	pC1b	267214250
aIPg3_R	aIPg3	5813098975	10	pC1c_R	pC1c	267551639
aIPg3_R	aIPg3	5813098975	9	aIPg1_R	aIPg1	707858790
aIPg3_R	aIPg3	5813098975	4	aIPg1_R	aIPg1	707863263
aIPg3_R	aIPg3	5813098975	11	aIPg1_R	aIPg1	1138212774
aIPg2_R	aIPg2	5813022814	8	aIPg2_R	aIPg2	5813035694
aIPg2_R	aIPg2	5813022814	3	aIPg2_R	aIPg2	1882009576
aIPg2_R	aIPg2	5813022814	3	aIPg1_R	aIPg1	707854989
aIPg2_R	aIPg2	5813022814	3	aIPg2_R	aIPg2	676479156

## Sheet: Fig 7 without IDs
Input type to Output type	Number of Synapses
pC1d to SMP555/556	521
pC1d to aIPg2	289
pC1d to aIPg1	151
aIPg1 to pC1d	134
pC1d to aIPg3	95
aIPg1 to aIPg1	88
pC1e to SMP555/556	87
aIPg2 to aIPg2	75
pC1a to SMP555/556	72
pC1c to SMP555/556	66
pC1a to pC1c	60
pC1e to aIPg1	58
pC1e to aIPg2	56
pC1a to pC1b	56
pC1a to pC1d	51
aIPg1 to aIPg2	48
aIPg1 to aIPg3	45
pC1c to pC1d	43
aIPg3 to aIPg1	41
aIPg1 to pC1e	40
pC1e to aIPg3	39
aIPg2 to aIPg1	38
pC1b to SMP555/556	33
pC1d to pC1e	21
pC1d to pC1c	19
pC1c to pC1e	19
pC1c to pC1b	17
aIPg3 to pC1c	16
SMP555/556 to SMP555/556	13
pC1d to pC1b	11
pC1e to pC1c	11
pC1a to pC1e	11

## Sheet: Fig 8A
Color of Synapses onto aIPg (n=11)	Input Name	Input type	Input bodyId	Number of Synapses onto aIPgs as a Group	Total Synapses onto Neurons as a Group	% of Total Output as a Group	Number of Synapses onto aIPgs as an Individual	Total Synapses onto Neurons as an individual	% of Total Output as an Individual
	pC1d_R	pC1d	5813063587	535	4034	13.2623	535	4034	13.2623
	CRE039_R	CRE039	5813054659	344	4414	7.79338	40	400	10
	CRE039_L	CRE039	5813054079	344	4414	7.79338	67	581	11.5318
	CRE039_L	CRE039	894551935	344	4414	7.79338	31	564	5.49645
	CRE039_L	CRE039	739572008	344	4414	7.79338	48	553	8.67993
	CRE039_R	CRE039	644148539	344	4414	7.79338	26	569	4.56942
	CRE039_R	CRE039	644153089	344	4414	7.79338	46	490	9.38776
	CRE039_L	CRE039	613083317	344	4414	7.79338	82	658	12.462
	CRE039_R	CRE039	5813123042	344	4414	7.79338	4	599	0.66778
	AOTU064(SCB012)_R	AOTU064	1038070642	273	3544	7.70316	273	3544	7.70316
	CRE040_R	CRE040	668967527	172	9369	1.83584	96	4946	1.94096
	CRE040(ADM10)_L	CRE040	549722579	172	9369	1.83584	76	4423	1.71829
	VES041(AVM21)_L	VES041	1325138112	172	14252	1.20685	64	7019	0.911811
	VES041_R	VES041	1534270924	172	14252	1.20685	108	7233	1.49316
	pC1e_R	pC1e	514850616	153	2654	5.76488	153	2654	5.76488
	oviIN_L	oviIN	485934965	92	53229	0.172838	31	24473	0.12667
	oviIN_R	oviIN	423101189	92	53229	0.172838	61	28756	0.21213

## Sheet: Fig 8B
Color of Synapses from aIPg (n=11)	Output name	Output type	Output bodyId	Number of Synapses from aIPgs as a Group	Total Input from Neurons as a Group	% of Total Input as a Group	Number of Synapses from aIPgs as an Individual	Total Input from Neurons as an Individual	% of Total Input as an Individual
	PVLP114_R	PVLP114	5813079288	703	4765	14.7534	703	4765	14.7534
	IB112(SCB076)_R	IB112	823913632	661	11926	5.54251	164	3562	4.60415
	IB112(SCB076)_L	IB112	703106626	661	11926	5.54251	497	8364	5.94213
	SMP054_R	SMP054	706520453	617	4303	14.3388	617	4303	14.3388
	SIP017_R	SIP017	675779986	533	3019	17.6549	533	3019	17.6549
	CL053_R	CL053	1627030775	429	5137	8.35118	429	5137	8.35118
	AOTU015_R	AOTU015	1324762843	327	4500	7.26667	153	1849	8.27474
	AOTU015_R	AOTU015	1509957347	327	4500	7.26667	73	1779	4.10343
	AOTU015_R	AOTU015	861578855	327	4500	7.26667	101	872	11.5826
	PVLP016_R	PVLP016	1385430156	290	1652	17.5545	290	1652	17.5545
	pC1d_R	pC1d	5813063587	145	4121	3.51856	145	4121	3.51856

## Sheet: Fig 9 S1
Input Name	Input type	Input bodyId	Number of Synapses from Input bodyId to Output bodyId	Input type to Output type	Number of Synapses from Input type to Output type	Output name	Output type	Output bodyId
	LLPC2c (n=45)			LLPC2c to PLP242	88	PLP242_R	PLP242	1407939124
	LLPC2c (n=45)			LLPC2c to PVLP015	93	PVLP015_R	PVLP015	1383383062
	LLPC2c (n=45)			LLPC2c to PVLP012	82	PVLP012_R	PVLP012	1353031856
	LLPC2c (n=45)			LLPC2c to PVLP012	82	PVLP012_R	PVLP012	2349505897
	LLPC1 (n=42)			LLPC1 to PVLP015	591	PVLP015_R	PVLP015	1383383062
	LLPC3 (n=27)			LLPC3 to PVLP015	265	PVLP015_R	PVLP015	1383383062
	LC4 (n=34)			LC4 to PVLP015	265	PVLP015_R	PVLP015	1383383062
	LC31 (n=12)			LC31 to PVLP015	422	PVLP015_R	PVLP015	1383383062
	LC10 (n=196)			LC10 to SMP149	58	SMP149_R	SMP149	607597135
	LC10 (n=196)			LC10 to SMP149	58	SMP149(ADM10)_L	SMP149	5813011483
	LC10 (n=196)			LC10 to AOTU008_a	1275	AOTU008_a_R	AOTU008_a	1008663864
	LC10 (n=196)			LC10 to AOTU008_a	1275	AOTU008_a_R	AOTU008_a	1009004209
	LC10 (n=196)			LC10 to AOTU008_a	1275	AOTU008_a_R	AOTU008_a	892268533
	LC10 (n=196)			LC10 to AOTU008_a	1275	AOTU008_a_R	AOTU008_a	986098785
	LC10 (n=196)			LC10 to AOTU008_a	1275	AOTU008_a_R	AOTU008_a	862270125
	LC10 (n=196)			LC10 to AOTU008_a	1275	AOTU008_a_R	AOTU008_a	861237679
	LC9 (n=120)			LC9 to LT82a	134	LT82a_R	LT82a	1221285128
	LC9 (n=120)			LC9 to PVLP015	937	PVLP015_R	PVLP015	1383383062
	LC9 (n=120)			LC9 to PVLP004	709	PVLP004_R	PVLP004	5813062942
	LC9 (n=120)			LC9 to PVLP004	709	PVLP004_R	PVLP004	5813058416
	LC9 (n=120)			LC9 to PVLP004	709	PVLP004_R	PVLP004	1073354472
	LC9 (n=120)			LC9 to PVLP004	709	PVLP004_R	PVLP004	889531496
	LC9 (n=120)			LC9 to PVLP004	709	PVLP004_R	PVLP004	5813110223
	LC9 (n=120)			LC9 to PVLP070	1091	PVLP070_R	PVLP070	5813061126
	LC9 (n=120)			LC9 to PVLP070	1091	PVLP070_R	PVLP070	1354731667
	LC9 (n=120)			LC9 to AVLP538	215	AVLP538_R	AVLP538	5813057579
	LC33 (n=11)			LC33 to CRE040	137	CRE040_R	CRE040	668967527
	LC33 (n=11)			LC33 to VES041	159	VES041_R	VES041	1534270924
	LC33 (n=11)			LC33 to VES041	159	VES041(AVM21)_L	VES041	1325138112
	LC21 (n=8)			LC21 to AVLP299_c	33	AVLP299_c_R	AVLP299_c	5813056622
	LC18 (n=30)			LC18 to AVLP490	82	AVLP490_R	AVLP490	1199556510
	LC18 (n=30)			LC18 to AVLP490	82	AVLP490_R	AVLP490	1136502893
	LC18 (n=30)			LC18 to AVLP538	39	AVLP538_R	AVLP538	5813057579
	LLPC2a (n=8)			LLPC2a to PVLP012	43	PVLP012_R	PVLP012	1353031856
	LLPC2a (n=8)			LLPC2a to PVLP012	43	PVLP012_R	PVLP012	2349505897
	LC11 (n=70)			LC11 to PVLP004	33	PVLP004_R	PVLP004	1073354472
	LC11 (n=70)			LC11 to PVLP004	33	PVLP004_R	PVLP004	889531496
	LC11 (n=70)			LC11 to PVLP012	102	PVLP012_R	PVLP012	1353031856
	LC11 (n=70)			LC11 to PVLP012	102	PVLP012_R	PVLP012	2349505897
	LC11 (n=70)			LC11 to AVLP538	1098	AVLP538_R	AVLP538	5813057579
	LC17 (n=184)			LC17 to AVLP538	2544	AVLP538_R	AVLP538	5813057579
	LC12 (n=26)			LC12 to AVLP538	90	AVLP538_R	AVLP538	5813057579
SMP149_R	SMP149	607597135	5	SMP149 to aIPg1	28	aIPg1_R	aIPg1	707858790
SMP149_R	SMP149	607597135	3	SMP149 to aIPg1	28	aIPg1_R	aIPg1	707863263
SMP149_R	SMP149	607597135	4	SMP149 to aIPg1	28	aIPg1_R	aIPg1	707854989
SMP149(ADM10)_L	SMP149	5813011483	7	SMP149 to aIPg1	28	aIPg1_R	aIPg1	707858790
SMP149(ADM10)_L	SMP149	5813011483	3	SMP149 to aIPg1	28	aIPg1_R	aIPg1	707863263
SMP149(ADM10)_L	SMP149	5813011483	6	SMP149 to aIPg1	28	aIPg1_R	aIPg1	707854989
PLP242_R	PLP242	1407939124	10	PLP242 to aIPg1	32	aIPg1_R	aIPg1	707858790
PLP242_R	PLP242	1407939124	5	PLP242 to aIPg1	32	aIPg1_R	aIPg1	707863263
PLP242_R	PLP242	1407939124	11	PLP242 to aIPg1	32	aIPg1_R	aIPg1	1138212774
PLP242_R	PLP242	1407939124	6	PLP242 to aIPg1	32	aIPg1_R	aIPg1	707854989
LT82a_R	LT82a	1221285128	11	LT82a to aIPg1	26	aIPg1_R	aIPg1	707858790
LT82a_R	LT82a	1221285128	7	LT82a to aIPg1	26	aIPg1_R	aIPg1	707863263
LT82a_R	LT82a	1221285128	5	LT82a to aIPg1	26	aIPg1_R	aIPg1	707854989
LT82a_R	LT82a	1221285128	3	LT82a to aIPg1	26	aIPg1_R	aIPg1	1138212774
PVLP015_R	PVLP015	1383383062	19	PVLP015 to aIPg1	60	aIPg1_R	aIPg1	707858790
PVLP015_R	PVLP015	1383383062	13	PVLP015 to aIPg1	60	aIPg1_R	aIPg1	707863263
PVLP015_R	PVLP015	1383383062	12	PVLP015 to aIPg1	60	aIPg1_R	aIPg1	1138212774
PVLP015_R	PVLP015	1383383062	16	PVLP015 to aIPg1	60	aIPg1_R	aIPg1	707854989
AVLP490_R	AVLP490	1199556510	11	AVLP490 - aIPg1	26	aIPg1_R	aIPg1	707863263
AVLP490_R	AVLP490	1199556510	6	AVLP490 - aIPg1	26	aIPg1_R	aIPg1	707854989
AVLP490_R	AVLP490	1136502893	9	AVLP490 - aIPg1	26	aIPg1_R	aIPg1	707854989
AOTU008_a_R	AOTU008_a	986098785	3	AOTU008_a to aIPg1	24	aIPg1_R	aIPg1	707858790
AOTU008_a_R	AOTU008_a	986098785	4	AOTU008_a to aIPg1	24	aIPg1_R	aIPg1	707863263
AOTU008_a_R	AOTU008_a	1009004209	4	AOTU008_a to aIPg1	24	aIPg1_R	aIPg1	707858790
AOTU008_a_R	AOTU008_a	1009004209	3	AOTU008_a to aIPg1	24	aIPg1_R	aIPg1	707854989
AOTU008_a_R	AOTU008_a	862270125	3	AOTU008_a to aIPg1	24	aIPg1_R	aIPg1	707863263
AOTU008_a_R	AOTU008_a	1008663864	3	AOTU008_a to aIPg1	24	aIPg1_R	aIPg1	707863263
AOTU008_a_R	AOTU008_a	892268533	4	AOTU008_a to aIPg1	24	aIPg1_R	aIPg1	707858790
CRE040_R	CRE040	668967527	8	CRE040 to aIPg1	31	aIPg1_R	aIPg1	707858790
CRE040_R	CRE040	668967527	9	CRE040 to aIPg1	31	aIPg1_R	aIPg1	707863263
CRE040_R	CRE040	668967527	11	CRE040 to aIPg1	31	aIPg1_R	aIPg1	1138212774
CRE040_R	CRE040	668967527	3	CRE040 to aIPg1	31	aIPg1_R	aIPg1	707854989
PVLP004_R	PVLP004	5813062942	5	PVLP004 to aIPg1	49	aIPg1_R	aIPg1	707858790
PVLP004_R	PVLP004	5813058416	7	PVLP004 to aIPg1	49	aIPg1_R	aIPg1	707858790
PVLP004_R	PVLP004	1073354472	4	PVLP004 to aIPg1	49	aIPg1_R	aIPg1	707858790
PVLP004_R	PVLP004	889531496	3	PVLP004 to aIPg1	49	aIPg1_R	aIPg1	707858790
PVLP004_R	PVLP004	5813062942	5	PVLP004 to aIPg1	49	aIPg1_R	aIPg1	707863263
PVLP004_R	PVLP004	5813110223	3	PVLP004 to aIPg1	49	aIPg1_R	aIPg1	1138212774
PVLP004_R	PVLP004	5813062942	6	PVLP004 to aIPg1	49	aIPg1_R	aIPg1	1138212774
PVLP004_R	PVLP004	5813058416	10	PVLP004 to aIPg1	49	aIPg1_R	aIPg1	1138212774
PVLP004_R	PVLP004	5813110223	3	PVLP004 to aIPg1	49	aIPg1_R	aIPg1	707854989
PVLP004_R	PVLP004	5813058416	3	PVLP004 to aIPg1	49	aIPg1_R	aIPg1	707854989
PVLP015_R	PVLP015	1383383062	7	PVLP015 to aIPg2	36	aIPg2_R	aIPg2	645456880
PVLP015_R	PVLP015	1383383062	3	PVLP015 to aIPg2	36	aIPg2_R	aIPg2	5813035694
PVLP015_R	PVLP015	1383383062	6	PVLP015 to aIPg2	36	aIPg2_R	aIPg2	1882009576
PVLP015_R	PVLP015	1383383062	10	PVLP015 to aIPg2	36	aIPg2_R	aIPg2	676479156
PVLP015_R	PVLP015	1383383062	10	PVLP015 to aIPg2	36	aIPg2_R	aIPg2	5813022814
AVLP490_R	AVLP490	1199556510	18	AVLP490 to aIPg2	66	aIPg2_R	aIPg2	645456880
AVLP490_R	AVLP490	1136502893	10	AVLP490 to aIPg2	66	aIPg2_R	aIPg2	645456880
AVLP490_R	AVLP490	1199556510	8	AVLP490 to aIPg2	66	aIPg2_R	aIPg2	5813035694
AVLP490_R	AVLP490	1199556510	10	AVLP490 to aIPg2	66	aIPg2_R	aIPg2	1882009576
AVLP490_R	AVLP490	1136502893	4	AVLP490 to aIPg2	66	aIPg2_R	aIPg2	1882009576
AVLP490_R	AVLP490	1199556510	13	AVLP490 to aIPg2	66	aIPg2_R	aIPg2	676479156
AVLP490_R	AVLP490	1199556510	3	AVLP490 to aIPg2	66	aIPg2_R	aIPg2	5813022814
AOTU008_a_R	AOTU008_a	1008663864	5	AOTU008_a to aIPg2	52	aIPg2_R	aIPg2	645456880
AOTU008_a_R	AOTU008_a	1009004209	6	AOTU008_a to aIPg2	52	aIPg2_R	aIPg2	645456880
AOTU008_a_R	AOTU008_a	892268533	6	AOTU008_a to aIPg2	52	aIPg2_R	aIPg2	645456880
AOTU008_a_R	AOTU008_a	1008663864	6	AOTU008_a to aIPg2	52	aIPg2_R	aIPg2	5813035694
AOTU008_a_R	AOTU008_a	986098785	4	AOTU008_a to aIPg2	52	aIPg2_R	aIPg2	5813035694
AOTU008_a_R	AOTU008_a	892268533	4	AOTU008_a to aIPg2	52	aIPg2_R	aIPg2	1882009576
AOTU008_a_R	AOTU008_a	1008663864	6	AOTU008_a to aIPg2	52	aIPg2_R	aIPg2	676479156
AOTU008_a_R	AOTU008_a	1009004209	3	AOTU008_a to aIPg2	52	aIPg2_R	aIPg2	676479156
AOTU008_a_R	AOTU008_a	892268533	4	AOTU008_a to aIPg2	52	aIPg2_R	aIPg2	676479156
AOTU008_a_R	AOTU008_a	862270125	4	AOTU008_a to aIPg2	52	aIPg2_R	aIPg2	676479156
AOTU008_a_R	AOTU008_a	861237679	4	AOTU008_a to aIPg2	52	aIPg2_R	aIPg2	676479156
CRE040_R	CRE040	668967527	7	CRE040 to aIPg2	54	aIPg2_R	aIPg2	645456880
CRE040_R	CRE040	668967527	21	CRE040 to aIPg2	54	aIPg2_R	aIPg2	5813035694
CRE040_R	CRE040	668967527	7	CRE040 to aIPg2	54	aIPg2_R	aIPg2	676479156
CRE040_R	CRE040	668967527	19	CRE040 to aIPg2	54	aIPg2_R	aIPg2	5813022814
VES041_R	VES041	1534270924	7	VES041 to aIPg2	139	aIPg2_R	aIPg2	645456880
VES041(AVM21)_L	VES041	1325138112	3	VES041 to aIPg2	139	aIPg2_R	aIPg2	645456880
VES041_R	VES041	1534270924	24	VES041 to aIPg2	139	aIPg2_R	aIPg2	5813035694
VES041(AVM21)_L	VES041	1325138112	21	VES041 to aIPg2	139	aIPg2_R	aIPg2	5813035694
VES041_R	VES041	1534270924	8	VES041 to aIPg2	139	aIPg2_R	aIPg2	1882009576
VES041(AVM21)_L	VES041	1325138112	4	VES041 to aIPg2	139	aIPg2_R	aIPg2	1882009576
VES041_R	VES041	1534270924	9	VES041 to aIPg2	139	aIPg2_R	aIPg2	676479156
VES041(AVM21)_L	VES041	1325138112	8	VES041 to aIPg2	139	aIPg2_R	aIPg2	676479156
VES041_R	VES041	1534270924	32	VES041 to aIPg2	139	aIPg2_R	aIPg2	5813022814
VES041(AVM21)_L	VES041	1325138112	23	VES041 to aIPg2	139	aIPg2_R	aIPg2	5813022814
AVLP299_c_R	AVLP299_c	5813056622	7	AVLP299_c to aIPg2	34	aIPg2_R	aIPg2	645456880
AVLP299_c_R	AVLP299_c	5813056622	6	AVLP299_c to aIPg2	34	aIPg2_R	aIPg2	5813035694
AVLP299_c_R	AVLP299_c	5813056622	3	AVLP299_c to aIPg2	34	aIPg2_R	aIPg2	1882009576
AVLP299_c_R	AVLP299_c	5813056622	12	AVLP299_c to aIPg2	34	aIPg2_R	aIPg2	676479156
AVLP299_c_R	AVLP299_c	5813056622	6	AVLP299_c to aIPg2	34	aIPg2_R	aIPg2	5813022814
CRE040_R	CRE040	668967527	6	CRE040 to aIPg3	16	aIPg3_R	aIPg3	768590452
CRE040_R	CRE040	668967527	5	CRE040 to aIPg3	16	aIPg3_R	aIPg3	5813098975
PVLP004_R	PVLP004	5813110223	7	PVLP004 to aIPg3	47	aIPg3_R	aIPg3	768590452
PVLP004_R	PVLP004	5813062942	5	PVLP004 to aIPg3	47	aIPg3_R	aIPg3	768590452
PVLP004_R	PVLP004	5813058416	15	PVLP004 to aIPg3	47	aIPg3_R	aIPg3	768590452
PVLP004_R	PVLP004	5813110223	6	PVLP004 to aIPg3	47	aIPg3_R	aIPg3	5813098975
PVLP004_R	PVLP004	5813062942	3	PVLP004 to aIPg3	47	aIPg3_R	aIPg3	5813098975
PVLP004_R	PVLP004	5813058416	7	PVLP004 to aIPg3	47	aIPg3_R	aIPg3	5813098975
PVLP004_R	PVLP004	1073354472	4	PVLP004 to aIPg3	47	aIPg3_R	aIPg3	5813098975
VES041_R	VES041	1534270924	5	VES041 to aIPg3	15	aIPg3_R	aIPg3	768590452
VES041_R	VES041	1534270924	10	VES041 to aIPg3	15	aIPg3_R	aIPg3	5813098975
PVLP012_R	PVLP012	1353031856	3	PVLP012 to aIPg3	19	aIPg3_R	aIPg3	768590452
PVLP012_R	PVLP012	2349505897	8	PVLP012 to aIPg3	19	aIPg3_R	aIPg3	5813098975
PVLP012_R	PVLP012	1353031856	8	PVLP012 to aIPg3	19	aIPg3_R	aIPg3	5813098975
PVLP070_R	PVLP070	5813061126	16	PVLP070 to aIPg3	55	aIPg3_R	aIPg3	768590452
PVLP070_R	PVLP070	1354731667	17	PVLP070 to aIPg3	55	aIPg3_R	aIPg3	768590452
PVLP070_R	PVLP070	5813061126	12	PVLP070 to aIPg3	55	aIPg3_R	aIPg3	5813098975
PVLP070_R	PVLP070	1354731667	10	PVLP070 to aIPg3	55	aIPg3_R	aIPg3	5813098975
AVLP538_R	AVLP538	5813057579	11	AVLP538 to aIPg3	19	aIPg3_R	aIPg3	768590452
AVLP538_R	AVLP538	5813057579	8	AVLP538 to aIPg3	19	aIPg3_R	aIPg3	5813098975

## Sheet: Fig 10A with IDs
Input name	Input type	Input bodyId	Number of Synapses	Output name	Output type	Output bodyId
aIPg1_R	aIPg1	707858790	3	AOTU015_R	AOTU015	1324762843
aIPg2_R	aIPg2	645456880	22	AOTU015_R	AOTU015	1324762843
aIPg2_R	aIPg2	645456880	10	AOTU015_R	AOTU015	1509957347
aIPg2_R	aIPg2	645456880	27	AOTU015_R	AOTU015	861578855
aIPg1_R	aIPg1	707863263	3	AOTU015_R	AOTU015	861578855
aIPg1_R	aIPg1	707863263	7	AOTU015_R	AOTU015	1324762843
aIPg1_R	aIPg1	707863263	5	AOTU015_R	AOTU015	1509957347
aIPg2_R	aIPg2	5813035694	15	AOTU015_R	AOTU015	861578855
aIPg2_R	aIPg2	5813035694	6	AOTU015_R	AOTU015	1509957347
aIPg2_R	aIPg2	5813035694	18	AOTU015_R	AOTU015	1324762843
aIPg2_R	aIPg2	1882009576	10	AOTU015_R	AOTU015	1509957347
aIPg2_R	aIPg2	1882009576	20	AOTU015_R	AOTU015	1324762843
aIPg2_R	aIPg2	1882009576	9	AOTU015_R	AOTU015	861578855
aIPg1_R	aIPg1	707854989	7	AOTU015_R	AOTU015	1509957347
aIPg1_R	aIPg1	707854989	15	AOTU015_R	AOTU015	861578855
aIPg1_R	aIPg1	707854989	29	AOTU015_R	AOTU015	1324762843
aIPg2_R	aIPg2	676479156	26	AOTU015_R	AOTU015	861578855
aIPg2_R	aIPg2	676479156	18	AOTU015_R	AOTU015	1509957347
aIPg2_R	aIPg2	676479156	39	AOTU015_R	AOTU015	1324762843
aIPg2_R	aIPg2	5813022814	17	AOTU015_R	AOTU015	1509957347
aIPg2_R	aIPg2	5813022814	6	AOTU015_R	AOTU015	861578855
aIPg2_R	aIPg2	5813022814	15	AOTU015_R	AOTU015	1324762843
aIPg1_R	aIPg1	707858790	4	AOTU023_R	AOTU023	861242327
aIPg2_R	aIPg2	645456880	34	AOTU023_R	AOTU023	861242327
aIPg1_R	aIPg1	707863263	6	AOTU023_R	AOTU023	861242327
aIPg2_R	aIPg2	5813035694	56	AOTU023_R	AOTU023	861242327
aIPg2_R	aIPg2	1882009576	18	AOTU023_R	AOTU023	861242327
aIPg1_R	aIPg1	707854989	12	AOTU023_R	AOTU023	861242327
aIPg2_R	aIPg2	676479156	49	AOTU023_R	AOTU023	861242327
aIPg2_R	aIPg2	5813022814	41	AOTU023_R	AOTU023	861242327
aIPg1_R	aIPg1	707858790	3	PS002_R	PS002	5813058342
aIPg1_R	aIPg1	707858790	5	PS002_R	PS002	675835107
aIPg1_R	aIPg1	707858790	9	PS002_R	PS002	5813022591
aIPg2_R	aIPg2	645456880	8	PS002_R	PS002	5813058342
aIPg2_R	aIPg2	645456880	16	PS002_R	PS002	5813022591
aIPg2_R	aIPg2	645456880	7	PS002_R	PS002	675835107
aIPg1_R	aIPg1	707863263	12	PS002_R	PS002	5813022591
aIPg1_R	aIPg1	707863263	6	PS002_R	PS002	5813058342
aIPg1_R	aIPg1	707863263	11	PS002_R	PS002	675835107
aIPg2_R	aIPg2	5813035694	4	PS002_R	PS002	675835107
aIPg2_R	aIPg2	5813035694	8	PS002_R	PS002	5813058342
aIPg2_R	aIPg2	1882009576	12	PS002_R	PS002	675835107
aIPg2_R	aIPg2	1882009576	14	PS002_R	PS002	5813058342
aIPg2_R	aIPg2	1882009576	16	PS002_R	PS002	5813022591
aIPg1_R	aIPg1	1138212774	3	PS002_R	PS002	5813058342
aIPg1_R	aIPg1	707854989	13	PS002_R	PS002	675835107
aIPg1_R	aIPg1	707854989	21	PS002_R	PS002	5813022591
aIPg1_R	aIPg1	707854989	13	PS002_R	PS002	5813058342
aIPg2_R	aIPg2	676479156	6	PS002_R	PS002	5813022591
aIPg2_R	aIPg2	676479156	4	PS002_R	PS002	675835107
aIPg2_R	aIPg2	676479156	13	PS002_R	PS002	5813058342
aIPg2_R	aIPg2	5813022814	5	PS002_R	PS002	5813058342
aIPg1_R	aIPg1	707858790	13	AOTU012_R	AOTU012	611694145
aIPg2_R	aIPg2	645456880	23	AOTU012_R	AOTU012	611694145
aIPg1_R	aIPg1	707863263	27	AOTU012_R	AOTU012	611694145
aIPg2_R	aIPg2	5813035694	10	AOTU012_R	AOTU012	611694145
aIPg2_R	aIPg2	1882009576	25	AOTU012_R	AOTU012	611694145
aIPg1_R	aIPg1	707854989	50	AOTU012_R	AOTU012	611694145
aIPg2_R	aIPg2	676479156	10	AOTU012_R	AOTU012	611694145
aIPg2_R	aIPg2	5813022814	5	AOTU012_R	AOTU012	611694145
aIPg2_R	aIPg2	645456880	6	AOTU016_R	AOTU016	861260193
aIPg2_R	aIPg2	645456880	4	AOTU016_R	AOTU016	673763861
aIPg2_R	aIPg2	645456880	4	AOTU016_R	AOTU016	862274410
aIPg1_R	aIPg1	707863263	3	AOTU016_R	AOTU016	861260193
aIPg2_R	aIPg2	5813035694	5	AOTU016_R	AOTU016	861246683
aIPg2_R	aIPg2	5813035694	5	AOTU016_R	AOTU016	673763861
aIPg2_R	aIPg2	5813035694	13	AOTU016_R	AOTU016	861260193
aIPg2_R	aIPg2	5813035694	9	AOTU016_R	AOTU016	862274410
aIPg2_R	aIPg2	1882009576	3	AOTU016_R	AOTU016	673763861
aIPg2_R	aIPg2	1882009576	3	AOTU016_R	AOTU016	861260193
aIPg1_R	aIPg1	707854989	5	AOTU016_R	AOTU016	862274410
aIPg1_R	aIPg1	707854989	3	AOTU016_R	AOTU016	861260193
aIPg1_R	aIPg1	707854989	4	AOTU016_R	AOTU016	673763861
aIPg2_R	aIPg2	676479156	5	AOTU016_R	AOTU016	861246683
aIPg2_R	aIPg2	676479156	4	AOTU016_R	AOTU016	862274410
aIPg2_R	aIPg2	676479156	9	AOTU016_R	AOTU016	861260193
aIPg2_R	aIPg2	5813022814	4	AOTU016_R	AOTU016	861246683
aIPg2_R	aIPg2	5813022814	11	AOTU016_R	AOTU016	862274410
aIPg2_R	aIPg2	5813022814	19	AOTU016_R	AOTU016	861260193
aIPg2_R	aIPg2	645456880	5	AOTU007_R	AOTU007	861928967
aIPg2_R	aIPg2	645456880	7	AOTU007_R	AOTU007	861241941
aIPg2_R	aIPg2	645456880	14	AOTU007_R	AOTU007	862947261
aIPg2_R	aIPg2	5813035694	3	AOTU007_R	AOTU007	861241941
aIPg2_R	aIPg2	5813035694	3	AOTU007_R	AOTU007	862947261
aIPg2_R	aIPg2	5813035694	8	AOTU007_R	AOTU007	861928967
aIPg2_R	aIPg2	1882009576	6	AOTU007_R	AOTU007	861928967
aIPg1_R	aIPg1	1138212774	3	AOTU007_R	AOTU007	769195048
aIPg1_R	aIPg1	707854989	3	AOTU007_R	AOTU007	861241941
aIPg1_R	aIPg1	707854989	3	AOTU007_R	AOTU007	861928967
aIPg2_R	aIPg2	676479156	3	AOTU007_R	AOTU007	861928967
aIPg2_R	aIPg2	676479156	3	AOTU007_R	AOTU007	861241941
aIPg2_R	aIPg2	676479156	7	AOTU007_R	AOTU007	862947261
aIPg2_R	aIPg2	676479156	5	AOTU007_R	AOTU007	769195048
aIPg2_R	aIPg2	5813022814	10	AOTU007_R	AOTU007	862947261
aIPg2_R	aIPg2	5813022814	6	AOTU007_R	AOTU007	861241941
aIPg2_R	aIPg2	5813022814	8	AOTU007_R	AOTU007	861928967
aIPg2_R	aIPg2	645456880	13	LAL027_R	LAL027	5812991668
aIPg1_R	aIPg1	707863263	10	LAL027_R	LAL027	5812991668
aIPg2_R	aIPg2	5813035694	6	LAL027_R	LAL027	5812991668
aIPg2_R	aIPg2	1882009576	11	LAL027_R	LAL027	5812991668
aIPg1_R	aIPg1	707854989	15	LAL027_R	LAL027	5812991668
aIPg2_R	aIPg2	676479156	12	LAL027_R	LAL027	5812991668
aIPg2_R	aIPg2	5813022814	24	LAL027_R	LAL027	5812991668
aIPg2_R	aIPg2	645456880	18	VES041_R	VES041	1534270924
aIPg2_R	aIPg2	5813035694	20	VES041_R	VES041	1534270924
aIPg2_R	aIPg2	1882009576	10	VES041_R	VES041	1534270924
aIPg2_R	aIPg2	676479156	20	VES041_R	VES041	1534270924
aIPg2_R	aIPg2	5813022814	21	VES041_R	VES041	1534270924
aIPg2_R	aIPg2	645456880	4	LAL025_R	LAL025	1632055020
aIPg2_R	aIPg2	645456880	13	LAL025_R	LAL025	1812493277
aIPg1_R	aIPg1	707863263	10	LAL025_R	LAL025	1812493277
aIPg2_R	aIPg2	5813035694	4	LAL025_R	LAL025	1812493277
aIPg2_R	aIPg2	1882009576	3	LAL025_R	LAL025	1632055020
aIPg2_R	aIPg2	1882009576	17	LAL025_R	LAL025	1812493277
aIPg1_R	aIPg1	1138212774	3	LAL025_R	LAL025	1812493277
aIPg1_R	aIPg1	707854989	9	LAL025_R	LAL025	1812493277
aIPg1_R	aIPg1	707854989	6	LAL025_R	LAL025	1632055020
aIPg2_R	aIPg2	676479156	3	LAL025_R	LAL025	1632055020
aIPg1_R	aIPg1	707858790	5	LAL026_R	LAL026	5813022548
aIPg2_R	aIPg2	645456880	7	LAL026_R	LAL026	5813022548
aIPg1_R	aIPg1	707863263	13	LAL026_R	LAL026	5813022548
aIPg2_R	aIPg2	5813035694	7	LAL026_R	LAL026	5813022548
aIPg2_R	aIPg2	1882009576	8	LAL026_R	LAL026	5813022548
aIPg2_R	aIPg2	1882009576	3	LAL026_R	LAL026	5812995899
aIPg1_R	aIPg1	707854989	5	LAL026_R	LAL026	5813022548
aIPg2_R	aIPg2	676479156	12	LAL026_R	LAL026	5813022548
aIPg2_R	aIPg2	5813022814	5	LAL026_R	LAL026	5813022548
aIPg2_R	aIPg2	645456880	14	VES041(AVM21)_L	VES041	1325138112
aIPg2_R	aIPg2	5813035694	17	VES041(AVM21)_L	VES041	1325138112
aIPg2_R	aIPg2	1882009576	3	VES041(AVM21)_L	VES041	1325138112
aIPg2_R	aIPg2	676479156	13	VES041(AVM21)_L	VES041	1325138112
aIPg2_R	aIPg2	5813022814	12	VES041(AVM21)_L	VES041	1325138112
aIPg1_R	aIPg1	707858790	15	SMP148_R	SMP148	1817712927
aIPg1_R	aIPg1	707858790	12	SMP148_R	SMP148	800212579
aIPg2_R	aIPg2	645456880	11	SMP148_R	SMP148	1817712927
aIPg2_R	aIPg2	645456880	25	SMP148_R	SMP148	800212579
aIPg1_R	aIPg1	707863263	23	SMP148_R	SMP148	1817712927
aIPg1_R	aIPg1	707863263	13	SMP148_R	SMP148	800212579
aIPg2_R	aIPg2	5813035694	9	SMP148_R	SMP148	1817712927
aIPg2_R	aIPg2	5813035694	8	SMP148_R	SMP148	800212579
aIPg2_R	aIPg2	1882009576	18	SMP148_R	SMP148	1817712927
aIPg2_R	aIPg2	1882009576	16	SMP148_R	SMP148	800212579
aIPg1_R	aIPg1	1138212774	8	SMP148_R	SMP148	1817712927
aIPg1_R	aIPg1	1138212774	9	SMP148_R	SMP148	800212579
aIPg1_R	aIPg1	707854989	17	SMP148_R	SMP148	1817712927
aIPg1_R	aIPg1	707854989	17	SMP148_R	SMP148	800212579
aIPg2_R	aIPg2	676479156	16	SMP148_R	SMP148	1817712927
aIPg2_R	aIPg2	676479156	19	SMP148_R	SMP148	800212579
aIPg2_R	aIPg2	5813022814	12	SMP148_R	SMP148	1817712927
aIPg2_R	aIPg2	5813022814	12	SMP148_R	SMP148	800212579
aIPg2_R	aIPg2	645456880	28	AOTU019_R	AOTU019	799868224
aIPg1_R	aIPg1	707863263	11	AOTU019_R	AOTU019	799868224
aIPg2_R	aIPg2	5813035694	28	AOTU019_R	AOTU019	799868224
aIPg2_R	aIPg2	1882009576	8	AOTU019_R	AOTU019	799868224
aIPg1_R	aIPg1	707854989	12	AOTU019_R	AOTU019	799868224
aIPg2_R	aIPg2	676479156	25	AOTU019_R	AOTU019	799868224
aIPg2_R	aIPg2	5813022814	22	AOTU019_R	AOTU019	799868224
pC1d_R	pC1d	5813063587	60	VES008_R	VES008	5813057245
aIPg3_R	aIPg3	5813098975	30	DNp27_R	DNp27	1072063538
aIPg3_R	aIPg3	768590452	30	DNp27_R	DNp27	1072063538
AOTU016_R	AOTU016	861260193	44	DNa04_R	DNa04	1262014782
AOTU016_R	AOTU016	673763861	90	DNa04_R	DNa04	1262014782
AOTU016_R	AOTU016	862274410	36	DNa04_R	DNa04	1262014782
AOTU016_R	AOTU016	861246683	63	DNa04_R	DNa04	1262014782
PS002_R	PS002	5813058342	11	DNb01_R	DNb01	1655997973
PS002_R	PS002	5813058342	48	DNb01_R	DNb01	1566597156
PS002_R	PS002	675835107	4	DNb01_R	DNb01	1655997973
PS002_R	PS002	675835107	72	DNb01_R	DNb01	1566597156
PS002_R	PS002	5813022591	10	DNb01_R	DNb01	1655997973
PS002_R	PS002	5813022591	75	DNb01_R	DNb01	1566597156
AOTU015_R	AOTU015	1324762843	51	DNa02_R	DNa02	1140245595
AOTU015_R	AOTU015	1509957347	66	DNa02_R	DNa02	1140245595
AOTU015_R	AOTU015	861578855	81	DNa02_R	DNa02	1140245595
AOTU007_R	AOTU007	861928967	19	DNa10(ADM03)_L	DNa10	1222928995
AOTU007_R	AOTU007	861928967	33	DNa10_R	DNa10	707116522
AOTU007_R	AOTU007	861241941	17	DNa10(ADM03)_L	DNa10	1222928995
AOTU007_R	AOTU007	861241941	20	DNa10_R	DNa10	707116522
AOTU007_R	AOTU007	862947261	23	DNa10(ADM03)_L	DNa10	1222928995
AOTU007_R	AOTU007	862947261	20	DNa10_R	DNa10	707116522
AOTU007_R	AOTU007	769195048	25	DNa10(ADM03)_L	DNa10	1222928995
AOTU007_R	AOTU007	769195048	23	DNa10_R	DNa10	707116522
VES041_R	VES041	1534270924	162	DNa03_R	DNa03	1139909038
VES041(AVM21)_L	VES041	1325138112	159	DNa03_R	DNa03	1139909038
AOTU012_R	AOTU012	611694145	131	DNa02_R	DNa02	1140245595
AOTU015_R	AOTU015	1324762843	54	DNa04_R	DNa04	1262014782
AOTU015_R	AOTU015	1509957347	41	DNa04_R	DNa04	1262014782
AOTU015_R	AOTU015	861578855	28	DNa04_R	DNa04	1262014782
AOTU023_R	AOTU023	861242327	103	DNp31_R	DNp31	1006984280
AOTU016_R	AOTU016	861260193	17	DNa08(aSP22)_R	DNa08	1074782432
AOTU016_R	AOTU016	673763861	23	DNa08(aSP22)_R	DNa08	1074782432
AOTU016_R	AOTU016	862274410	19	DNa08(aSP22)_R	DNa08	1074782432
AOTU016_R	AOTU016	861246683	25	DNa08(aSP22)_R	DNa08	1074782432
LAL026_R	LAL026	5813022548	45	DNa02_R	DNa02	1140245595
LAL026_R	LAL026	5812995899	35	DNa02_R	DNa02	1140245595
AOTU016_R	AOTU016	861260193	31	DNb01_R	DNb01	1655997973
AOTU016_R	AOTU016	862274410	12	DNb01_R	DNb01	1655997973
AOTU016_R	AOTU016	861246683	35	DNb01_R	DNb01	1655997973
LAL026_R	LAL026	5813022548	61	DNa01_R	DNa01	1170939344
LAL026_R	LAL026	5812995899	16	DNa01_R	DNa01	1170939344
PS002_R	PS002	5813058342	9	DNp03_R	DNp03	1565846637
PS002_R	PS002	675835107	29	DNp03_R	DNp03	1565846637
PS002_R	PS002	5813022591	22	DNp03_R	DNp03	1565846637
LAL027_R	LAL027	5812991668	59	DNa02_R	DNa02	1140245595
LAL025_R	LAL025	1632055020	20	DNb02_R	DNb02	1904885509
LAL025_R	LAL025	1632055020	20	DNb02_R	DNb02	1477239390
LAL025_R	LAL025	1812493277	11	DNb02_R	DNb02	1904885509
LAL025_R	LAL025	1812493277	6	DNb02_R	DNb02	1477239390
LAL025_R	LAL025	1632055020	56	DNa01_R	DNa01	1170939344
AOTU016_R	AOTU016	673763861	45	DNa02_R	DNa02	1140245595
AOTU016_R	AOTU016	862274410	6	DNa02_R	DNa02	1140245595
AOTU023_R	AOTU023	861242327	24	DNb04_R	DNb04	1037393225
AOTU023(ADM11)_L	AOTU023	1191500957	43	DNb04_R	DNb04	1037393225
AOTU023(ADM11)_L	AOTU023	1191500957	111	DNp31_R	DNp31	1006984280
SMP148(ADM10)_L	SMP148	703179848	93	DNa03_R	DNa03	1139909038
SMP148(ADM10)_L	SMP148	5813022163	89	DNa03_R	DNa03	1139909038
AOTU019(ADM10)_L	AOTU019	1605518663	188	DNa02_R	DNa02	1140245595
AOTU019(ADM10)_L	AOTU019	1605518663	334	DNa03_R	DNa03	1139909038
AOTU019(ADM10)_L	AOTU019	1605518663	92	DNa04_R	DNa04	1262014782
AOTU019(ADM10)_L	AOTU019	1605518663	39	DNb02_R	DNb02	1904885509
AOTU019(ADM10)_L	AOTU019	1605518663	36	DNb02_R	DNb02	1477239390
VES008_R	VES008	5813057245	175	DNa02_R	DNa02	1140245595

## Sheet: Fig 10A without IDs
Input type to Output type	Number of Synapses
aIPg type 1 and 2 to AOTU007_R	97
aIPg type 1 and 2 to AOTU023_R	220
aIPg type 1 and 2 to SMP148_R	260
aIPg type 1 and 2 to VES041_R	89
aIPg type 1 and 2 to VES041_L	59
aIPg type 1 and 2 to AOTU019_R	134
aIPg type 1 and 2 to PS002_R	209
aIPg type 1 and 2 to AOTU016_R	119
aIPg type 1 and 2 to AOTU015_R	327
aIPg type 1 and 2 to LAL027_R	91
aIPg type 1 and 2 to AOTU012_R	163
aIPg type 1 and 2 to LAL026_R	65
aIPg type 1 and 2 to LAL025_R	72
pC1d_R to VES008_R	60
aIPg3_R to DNp27_R	60
AOTU007_R to DNa10_R	96
AOTU007_R to DNa10_L	84
AOTU023_R to DNp31_R	103
AOTU023_R to DNb04_R	24
VES041_R to DNa03_R	162
PS002_R to DNp03_R	60
PS002_R to DNb01_R	220
AOTU016_R to DNb01_R	78
AOTU016_R to DNa08	84
AOTU016_R to DNa04_R	233
AOTU015_R to DNa04_R	123
AOTU016_R to DNa02_R	51
AOTU015_R to DNa02_R	198
LAL027_R to DNa02_R	59
AOTU012_R to DNa02_R	131
VES008_R to DNa02_R	175
LAL026_R to DNa02_R	80
LAL026_R to DNa01_R	77
LAL025_R to DNa01_R	56
LAL025_R to DNb02_R	57
AOTU023_L to DNp31_R	111
AOTU023_L to DNb04_R	43
SMP148_L to DNa03_R	182
VES041_L to DNa03_R	159
AOTU019_L to DNa03_R	334
AOTU019_L to DNa04_R	92
AOTU019_L to DNa02_R	188
AOTU019_L to DNb02_R	75

[truncated: 7 more sheets: Fig 10B with IDs, Fig 10B without IDs, Fig 10-S1, Fig 10-S2, Fig 11, Fig 12 S1 Panel A, Fig 12-S1 Panel B]
